# Supplementary material
Source: Springer Nature journal article supplement (https://www.springermedizin.de/resource/supplementary/12984_2006_62_MOESM2_ESM.pdf/9605222)

a.u.

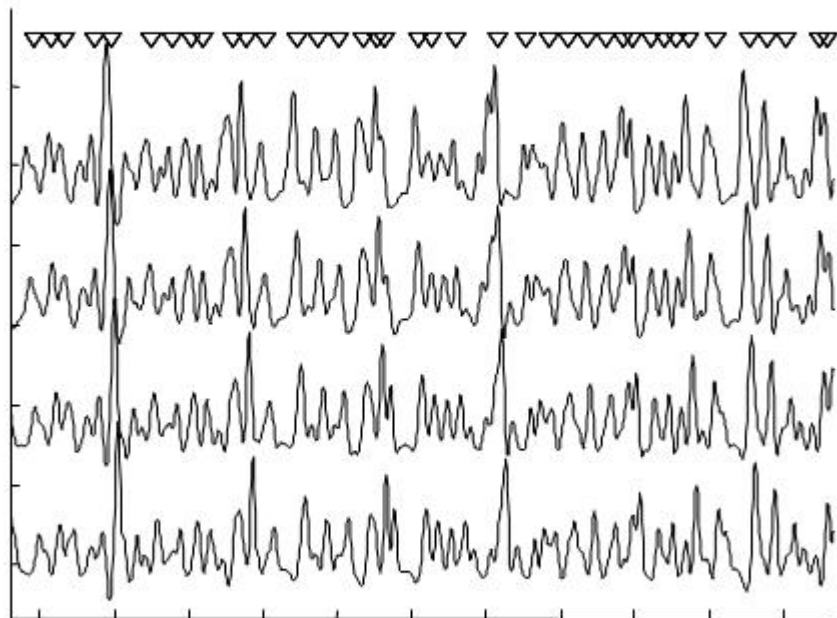

0.05 s

a.u.

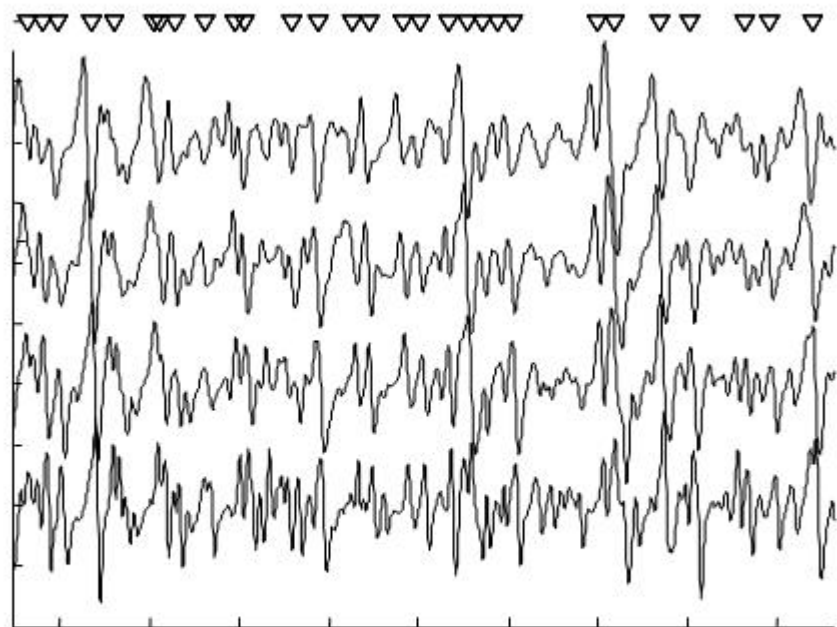

0.05 s

Supplement: MOESM2 [file 9605222]
